# Supplementary material for: Magnesium Levels Modify the Effect of Lipid Parameters on Carotid Intima Media Thickness
Source: PubMed Central journal article supplement (PMC7551902; doi:10.3390/nu12092631), 2020-08-28
Supplement: nutrients-12-02631-s001.pdf [file nutrients-12-02631-s001.pdf]

Supplemental Table S1. Bivariate correlation coefficients between cIMT and Magnesium levels with other variables in control volunteers

| Variable          | cIMT  |         | Magnesium |         |
|-------------------|-------|---------|-----------|---------|
|                   | r     | p value | r         | p value |
| Sex (Male)        | 0.260 | <0.001  | 0.102     | 0.138   |
| Race (Caucasian)  | 0.071 | 0.301   | 0.008     | 0.913   |
| Age, years        | 0.623 | <0.001  | 0.06      | 0.382   |
| Smoker            | 0.040 | 0.561   | 0.014     | 0.844   |
| Diabetes          | -     | -       | -         | -       |
| Hypertension      | 0.324 | <0.001  | 0.131     | 0.057   |
| Dyslipidemia      | 0.199 | 0.004   | 0.063     | 0.364   |
| BMI               | 0.248 | <0.001  | -0.055    | 0.427   |
| Total Cholesterol | 0.255 | <0.001  | 0.023     | 0.740   |
| HDL Cholesterol   | 0.006 | 0.934   | -0.077    | 0.298   |
| LDL Cholesterol   | 0.219 | 0.003   | -0.001    | 0.990   |
| Triglycerides     | 0.159 | 0.023   | 0.108     | 0.122   |
| Magnesium         | 0.091 | 0.185   | -         | -       |
| cIMT              | -     | -       | 0.091     | 0.185   |

Pearson's correlation coefficients (r) and p-value are shown for each variable. Abbreviations: Body Mass Index (BMI), Carotid Intima-Media Thickness (cIMT).
